# Supplementary material for: Curcumin Improves the Renal Autophagy in Rat Experimental Membranous Nephropathy via Regulating the PI3K/AKT/mTOR and Nrf2/HO‐1 Signaling Pathways
Source: Hindawi journal article supplement (doi:10.1155/2020/7069052), 2020-01-01

## supplementary file Figure S1

Full unedited versions of the western blots for Figure 2B

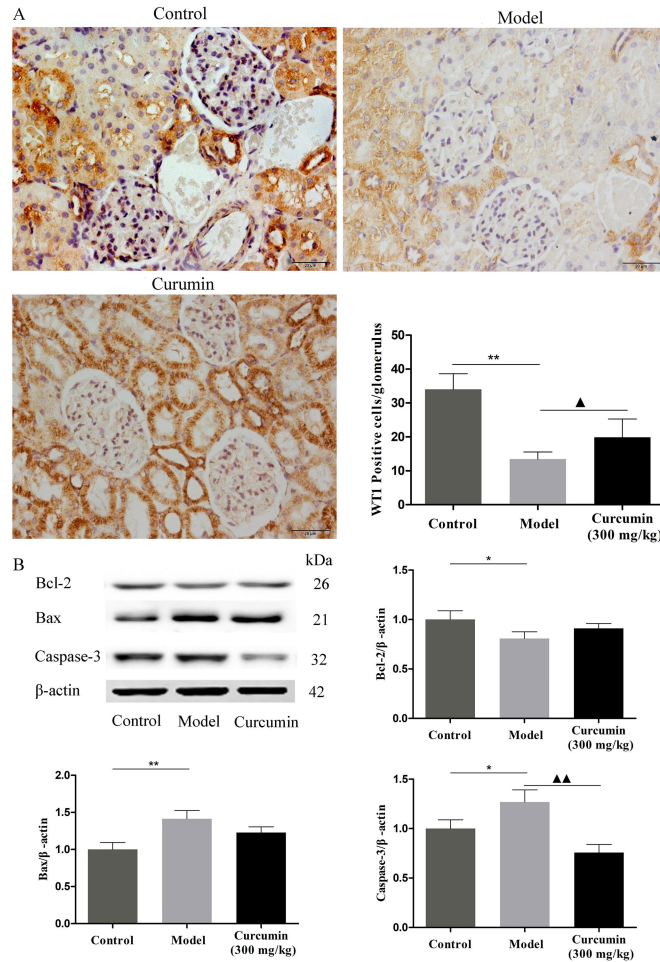

**Figure 2 Curcumin attenuated the podocyte loss and apoptosis in PHN rats.** **A** Podocyte number in the glomerular was estimated with the immunohistochemistry (Scale bars 20  $\mu$ m). **B** Expression of Bcl-2, Bax, and Caspase-3, the apoptosis-related proteins in renal tissues. \* $P < 0.05$ ; \*\* $P < 0.01$ , the model group vs the control group,  $\blacktriangle P < 0.05$ ;  $\blacktriangle\blacktriangle P < 0.01$ , the model group vs the curcumin (300 mg/kg) group.

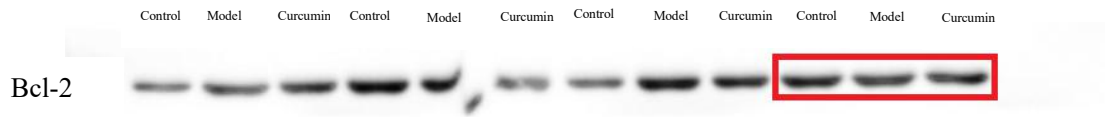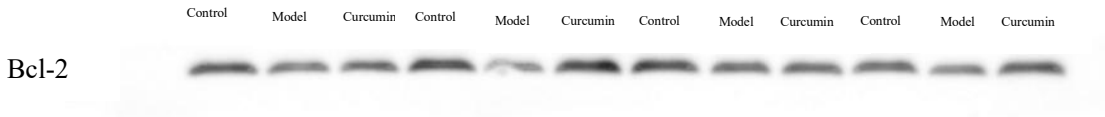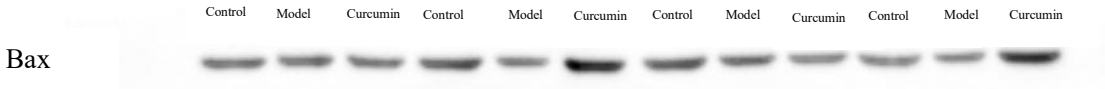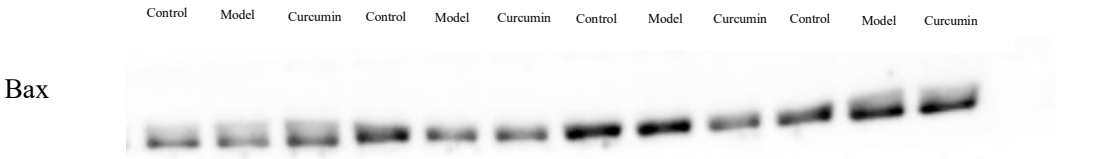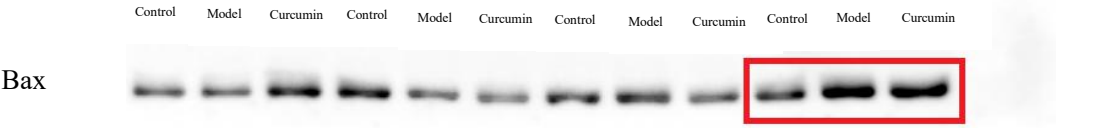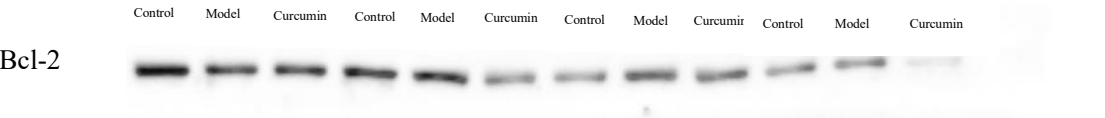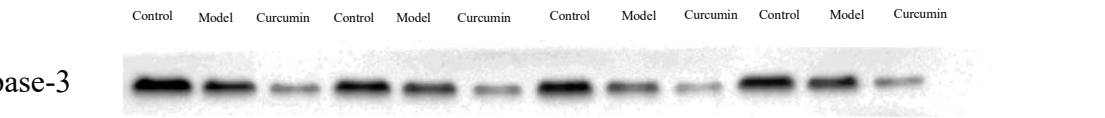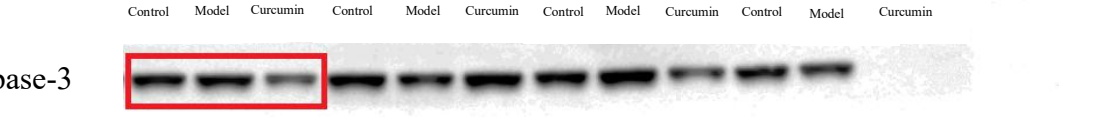

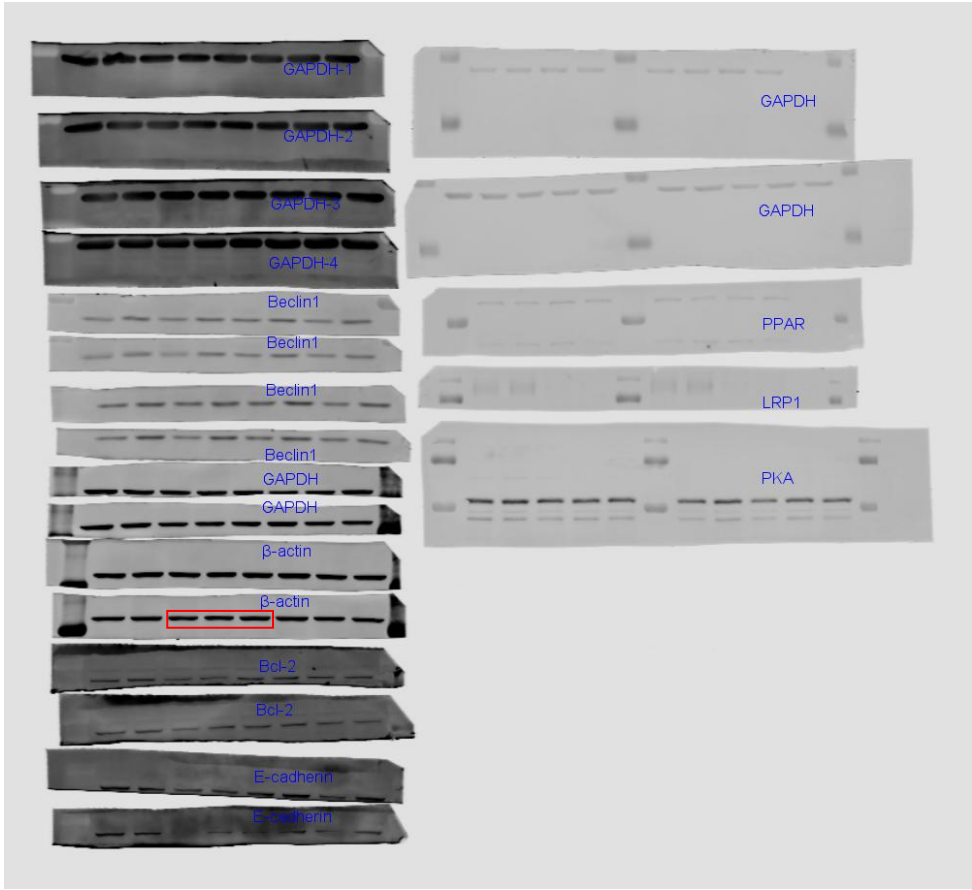

Supplement: f1 [file 7069052.f1.pdf]
