# Supplementary material for: Curcumin Improves the Renal Autophagy in Rat Experimental Membranous Nephropathy via Regulating the PI3K/AKT/mTOR and Nrf2/HO‐1 Signaling Pathways
Source: Hindawi journal article supplement (doi:10.1155/2020/7069052), 2020-01-01

## supplementary file Figure S2

Full unedited versions of the western blots for Figure 3A

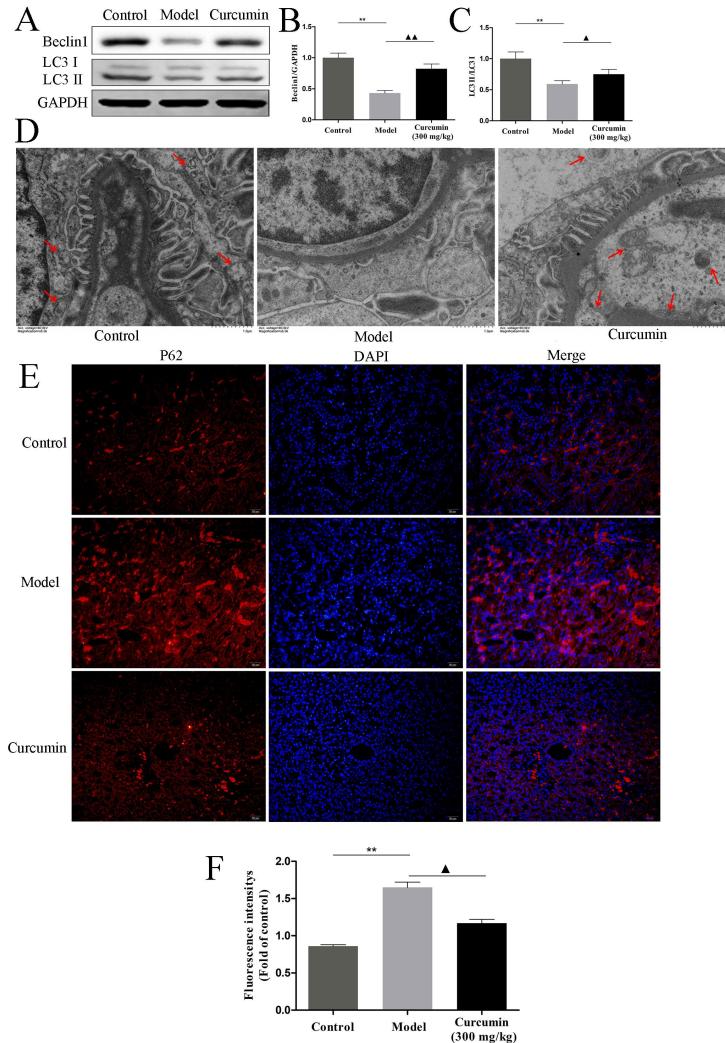

**Figure 3 Curcumin treatment improves the autophagy of podocyte in PHN rats. A** Representative Western blotting images of beclin1, LC3-II, and LC3-I in the renal tissues of PHN rats. GAPDH is used as a loading control. **B** Quantification of beclin1 in the PHN rats. **C** Quantification of the LC3-II/LC3-I ratio in the PHN rats. **D** Ultrastructure of autophagosomes (*arrows*) of podocytes in the control and model group were detected by the transmission electron microscopy (TEM, original magnification  $\times 6000$ ) **E** Immunofluorescence staining for p62 expression in the renal tissues of PHN rats (Scale

bars 20  $\mu\text{m}$ ). **F** Analysis of fluorescence intensity of p62 positive cells in the PHN rats.  $**P < 0.01$ , the model group vs the control group,  $^{\wedge}P < 0.05$  the model group vs the curcumin (300 mg/kg) group.

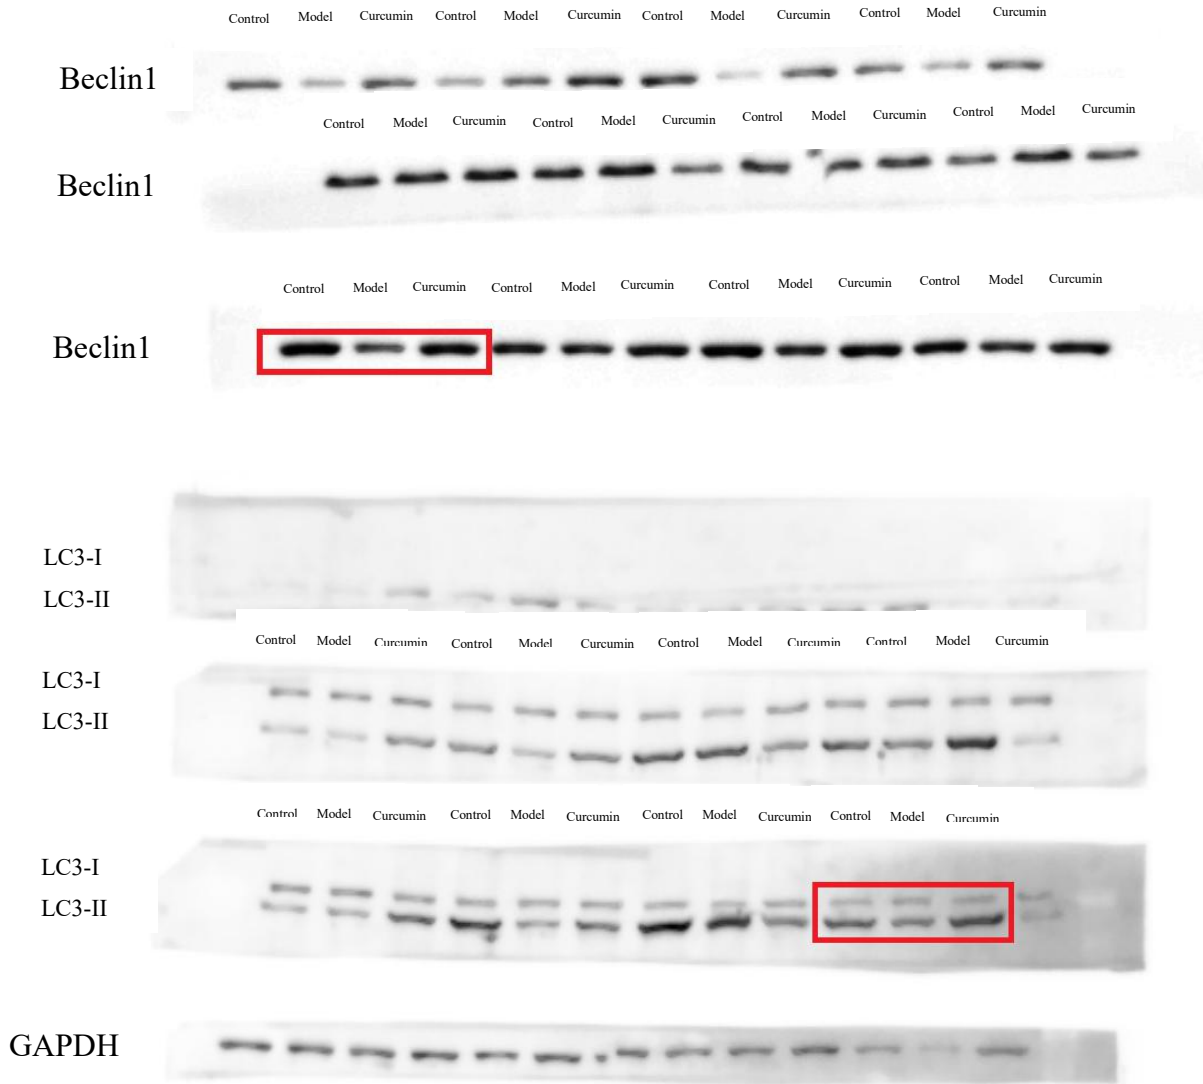

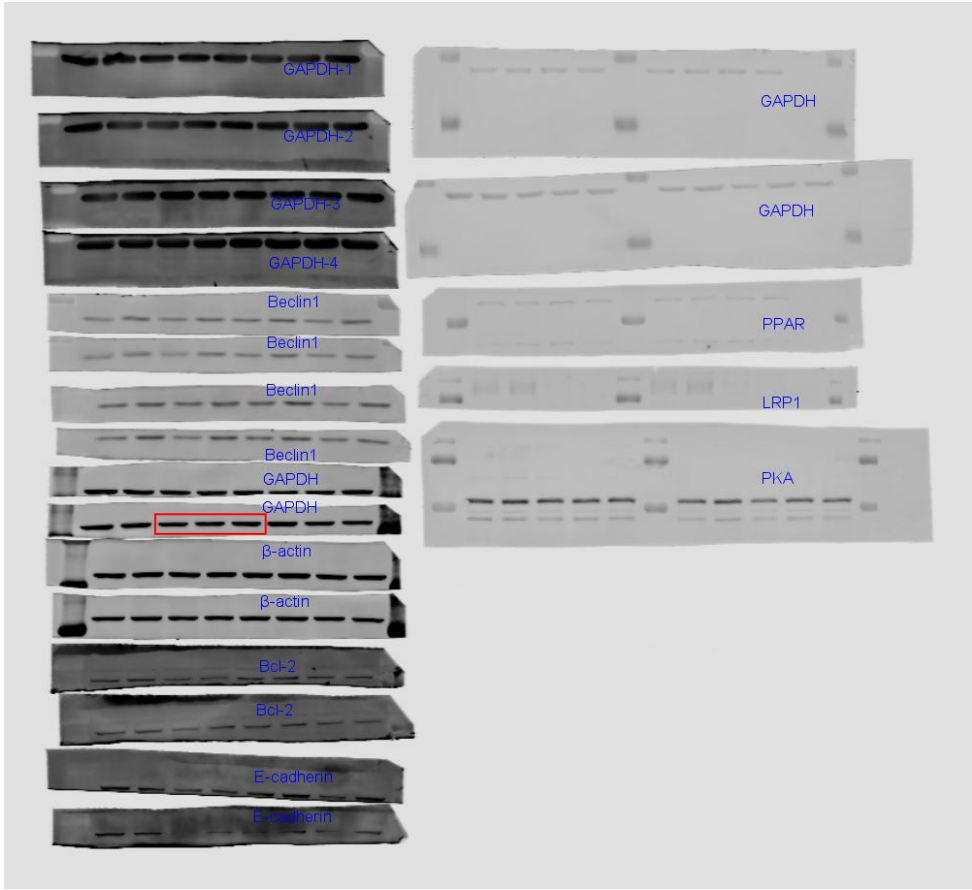

Supplement: f2 [file 7069052.f2.pdf]
