# Supplementary material for: Curcumin Improves the Renal Autophagy in Rat Experimental Membranous Nephropathy via Regulating the PI3K/AKT/mTOR and Nrf2/HO‐1 Signaling Pathways
Source: Hindawi journal article supplement (doi:10.1155/2020/7069052), 2020-01-01
Supplement: f3 [file 7069052.f3.pdf]

## supplementary file Figure S3

Full unedited versions of the western blots for Figure 4A

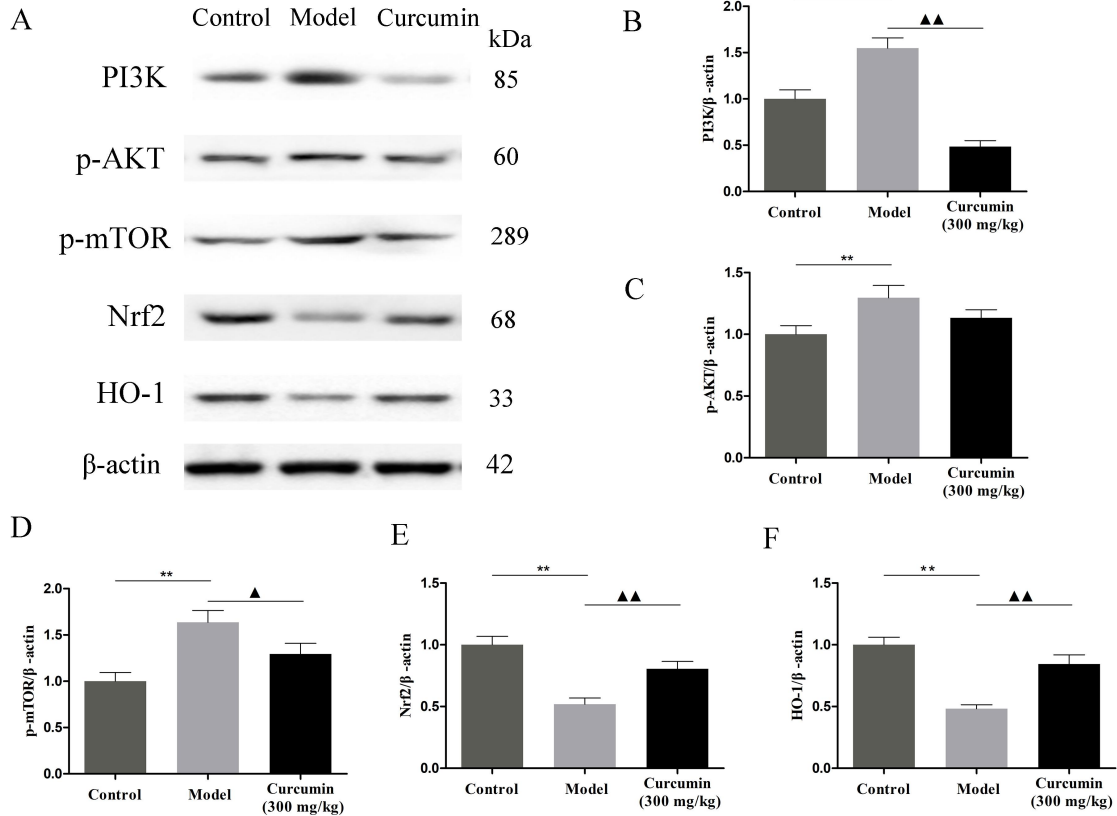

**Figure 4 Curcumin blocks PI3K/AKT/mTOR pathway and activates the Nrf2/HO-1 pathway in the renal tissues of PHN rats.** A Western blot image of PI3K, p-AKT, p-mTOR, Nrf2, and HO-1.  $\beta$ -actin is selected as a loading control. B-F The statistical data of PI3K, p-AKT, p-mTOR, Nrf2, and HO-1 was analyzed with Image J v1.8.0 software. Data were expressed as mean  $\pm$  SD, \*\* $P < 0.01$ , the model group vs the control group,  $\blacktriangle P < 0.05$ ;  $\blacktriangle\blacktriangle P < 0.01$ , the model group vs the curcumin (300 mg/kg) group.

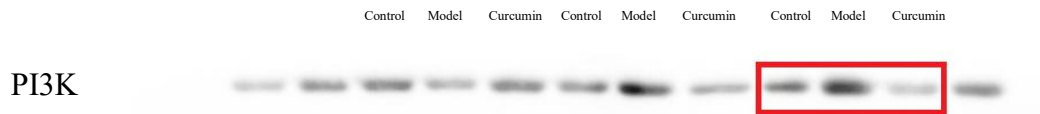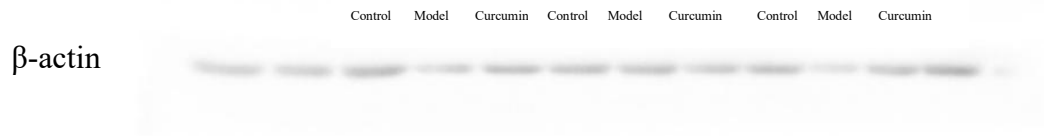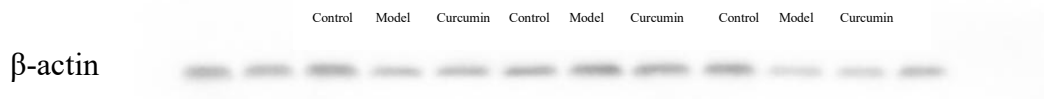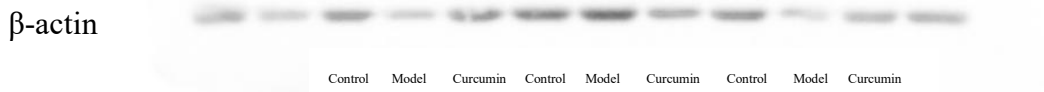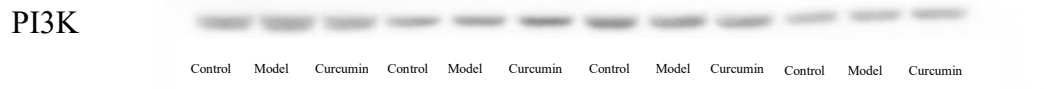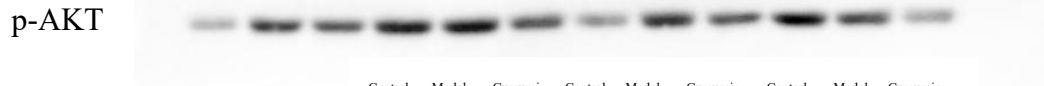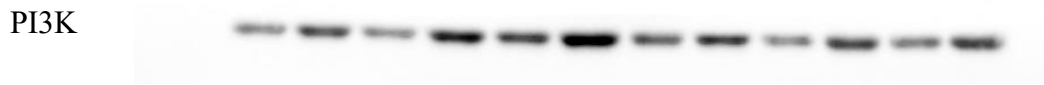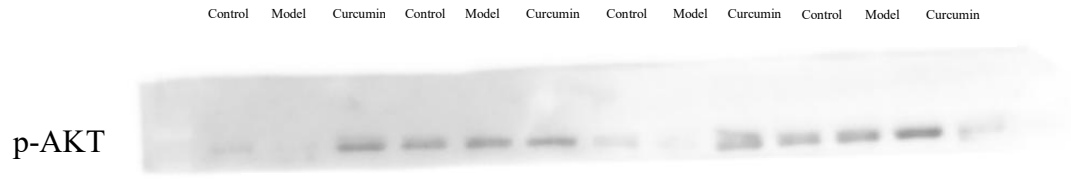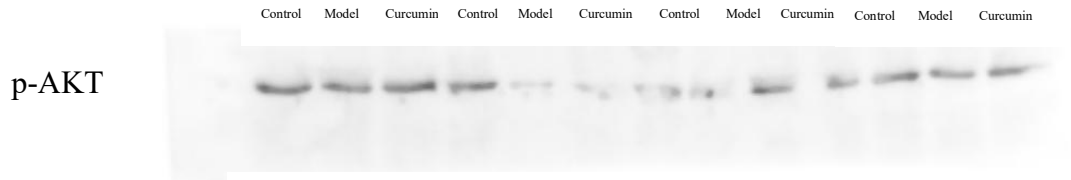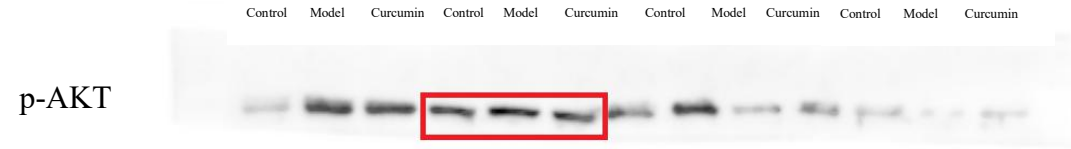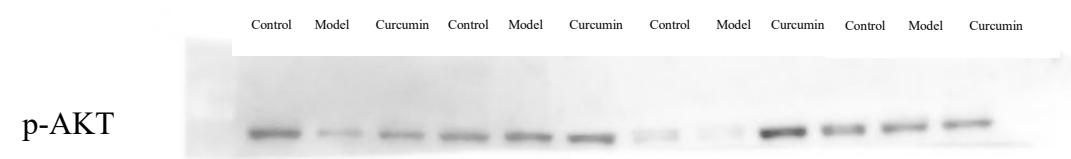

p-mTOR

p-mTOR

p-mTOR

p-mTOR

p-mTOR

p-mTOR

Control Model Curcumin Control Model Curcumin Control Model Curcumin

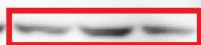

Nrf2

Nrf2

Nrf2

Nrf2

Nrf2

Nrf2

Control Model Curcumin Control Model Curcumin Control Model Curcumin

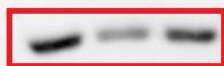

Control Model Curcumin Control Model Curcumi Control Model Curcumin

HO-1

HO-1

HO-1

HO-1

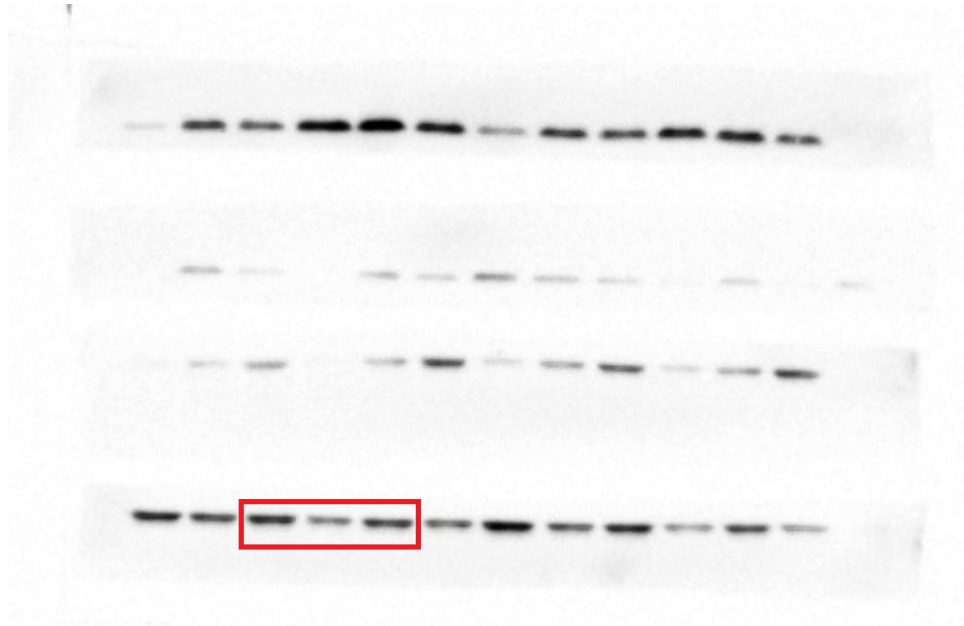

Control Model Curcumin Control Model Curcumin

$\beta$ -actin

HO-1

HO-1

$\beta$ -actin

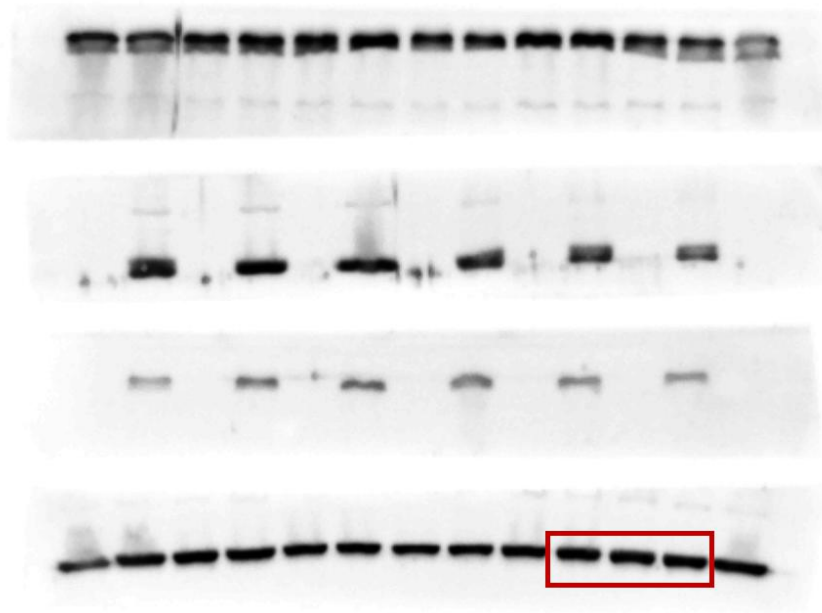

Control Model Curcumin

Control Model Curcumin

Control Model Curcumin

Control Model Curcumin
